# Supplementary material
Source: publisher figshare collection journal article supplement (https://karger.figshare.com/articles/dataset/_/5123629)
Supplement: Supplementary file 1 [file 1 › 000339208_sm_Figures.pdf]

## Supplementary Figure 1:

Definition of the PACE brief limited intermittent psychotic symptoms (BLIPS) criteria over time

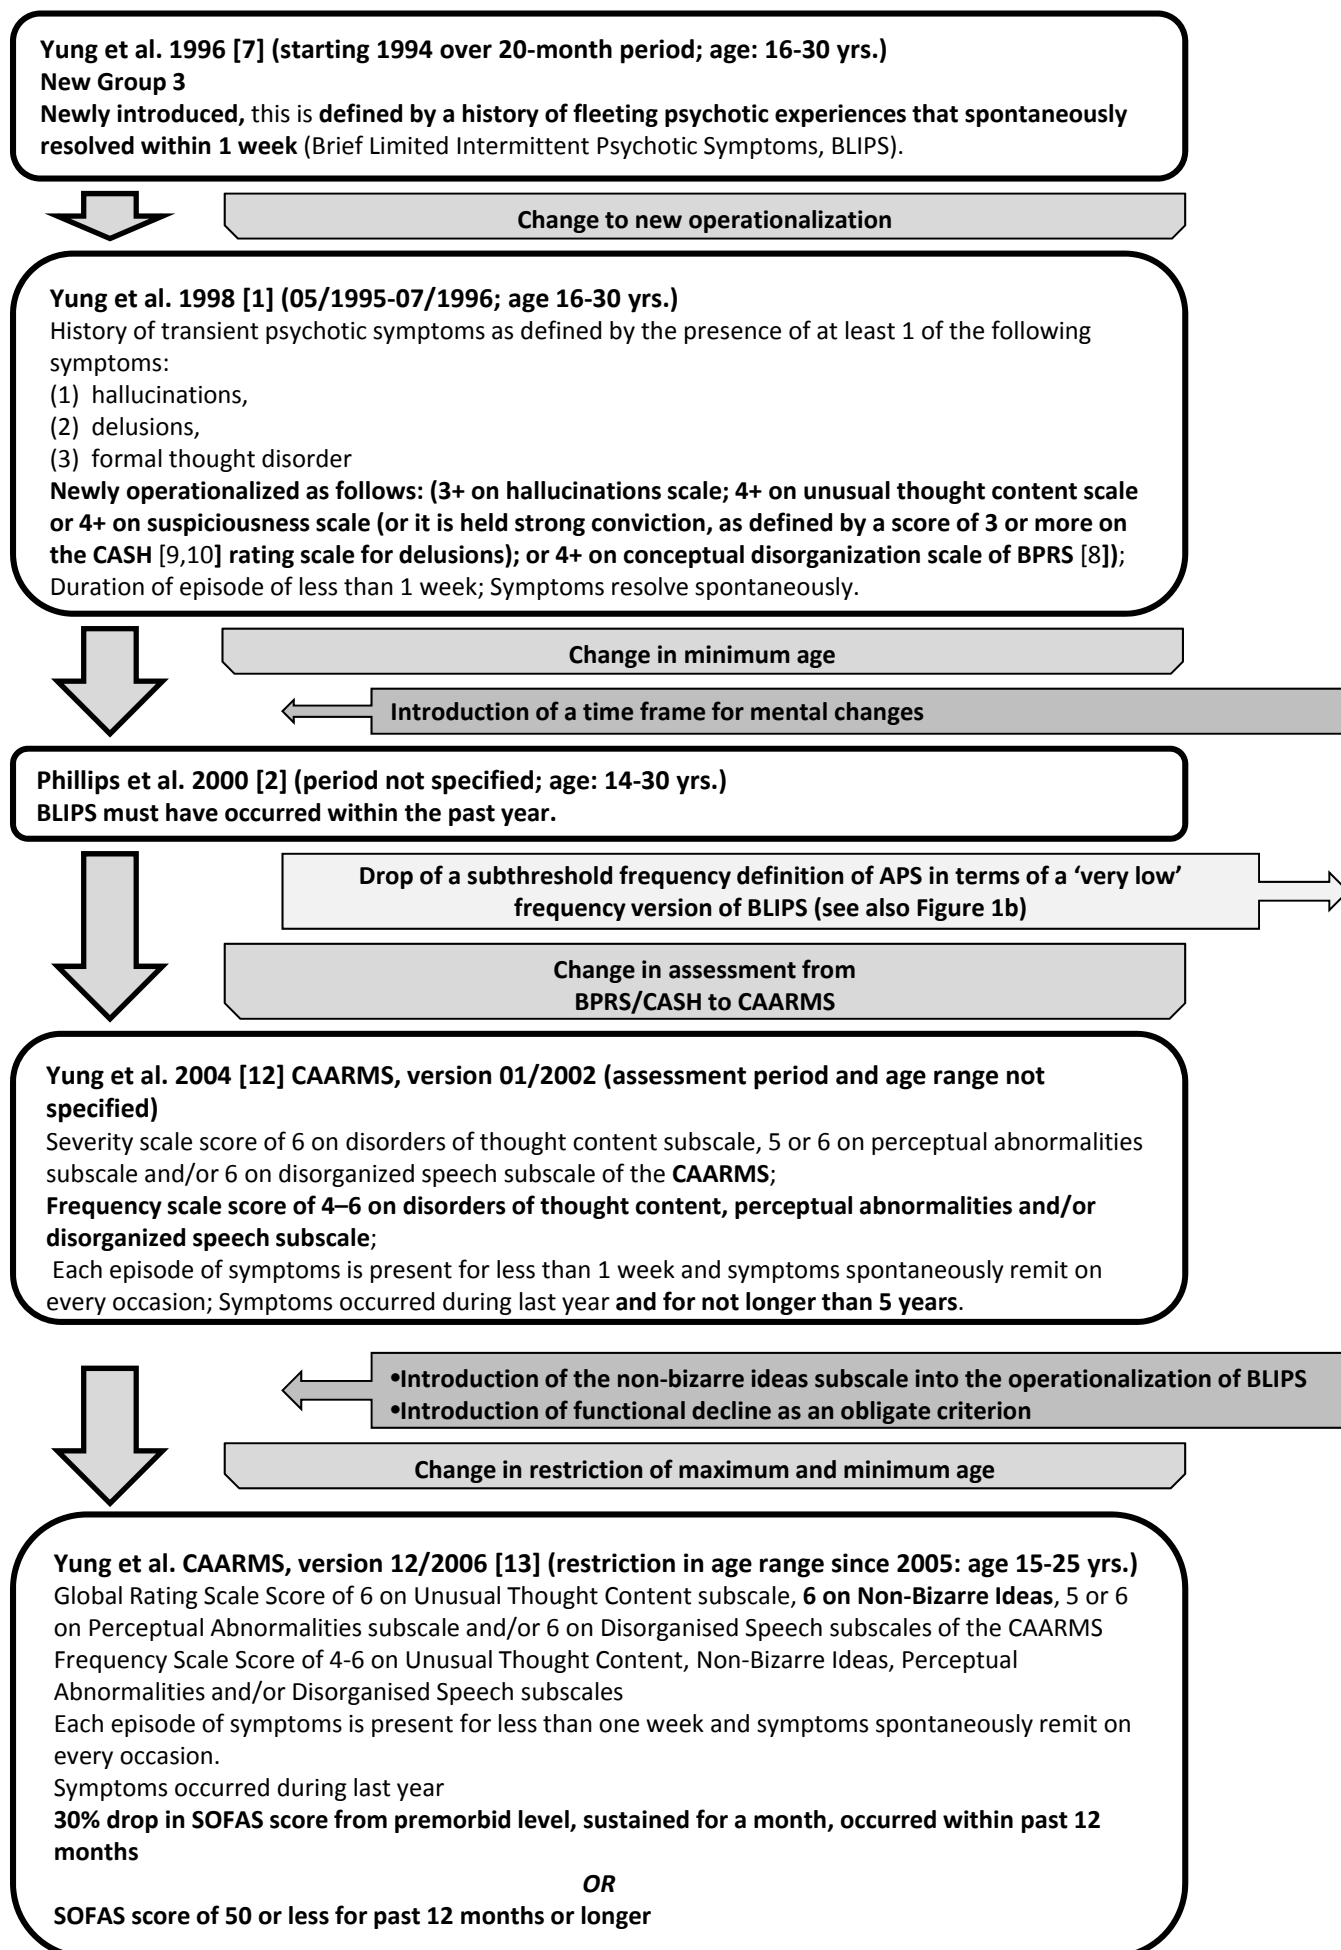

## Supplementary Figure 2:

Definition of the PACE ,trait-state' risk factors / vulnerability criteria over time

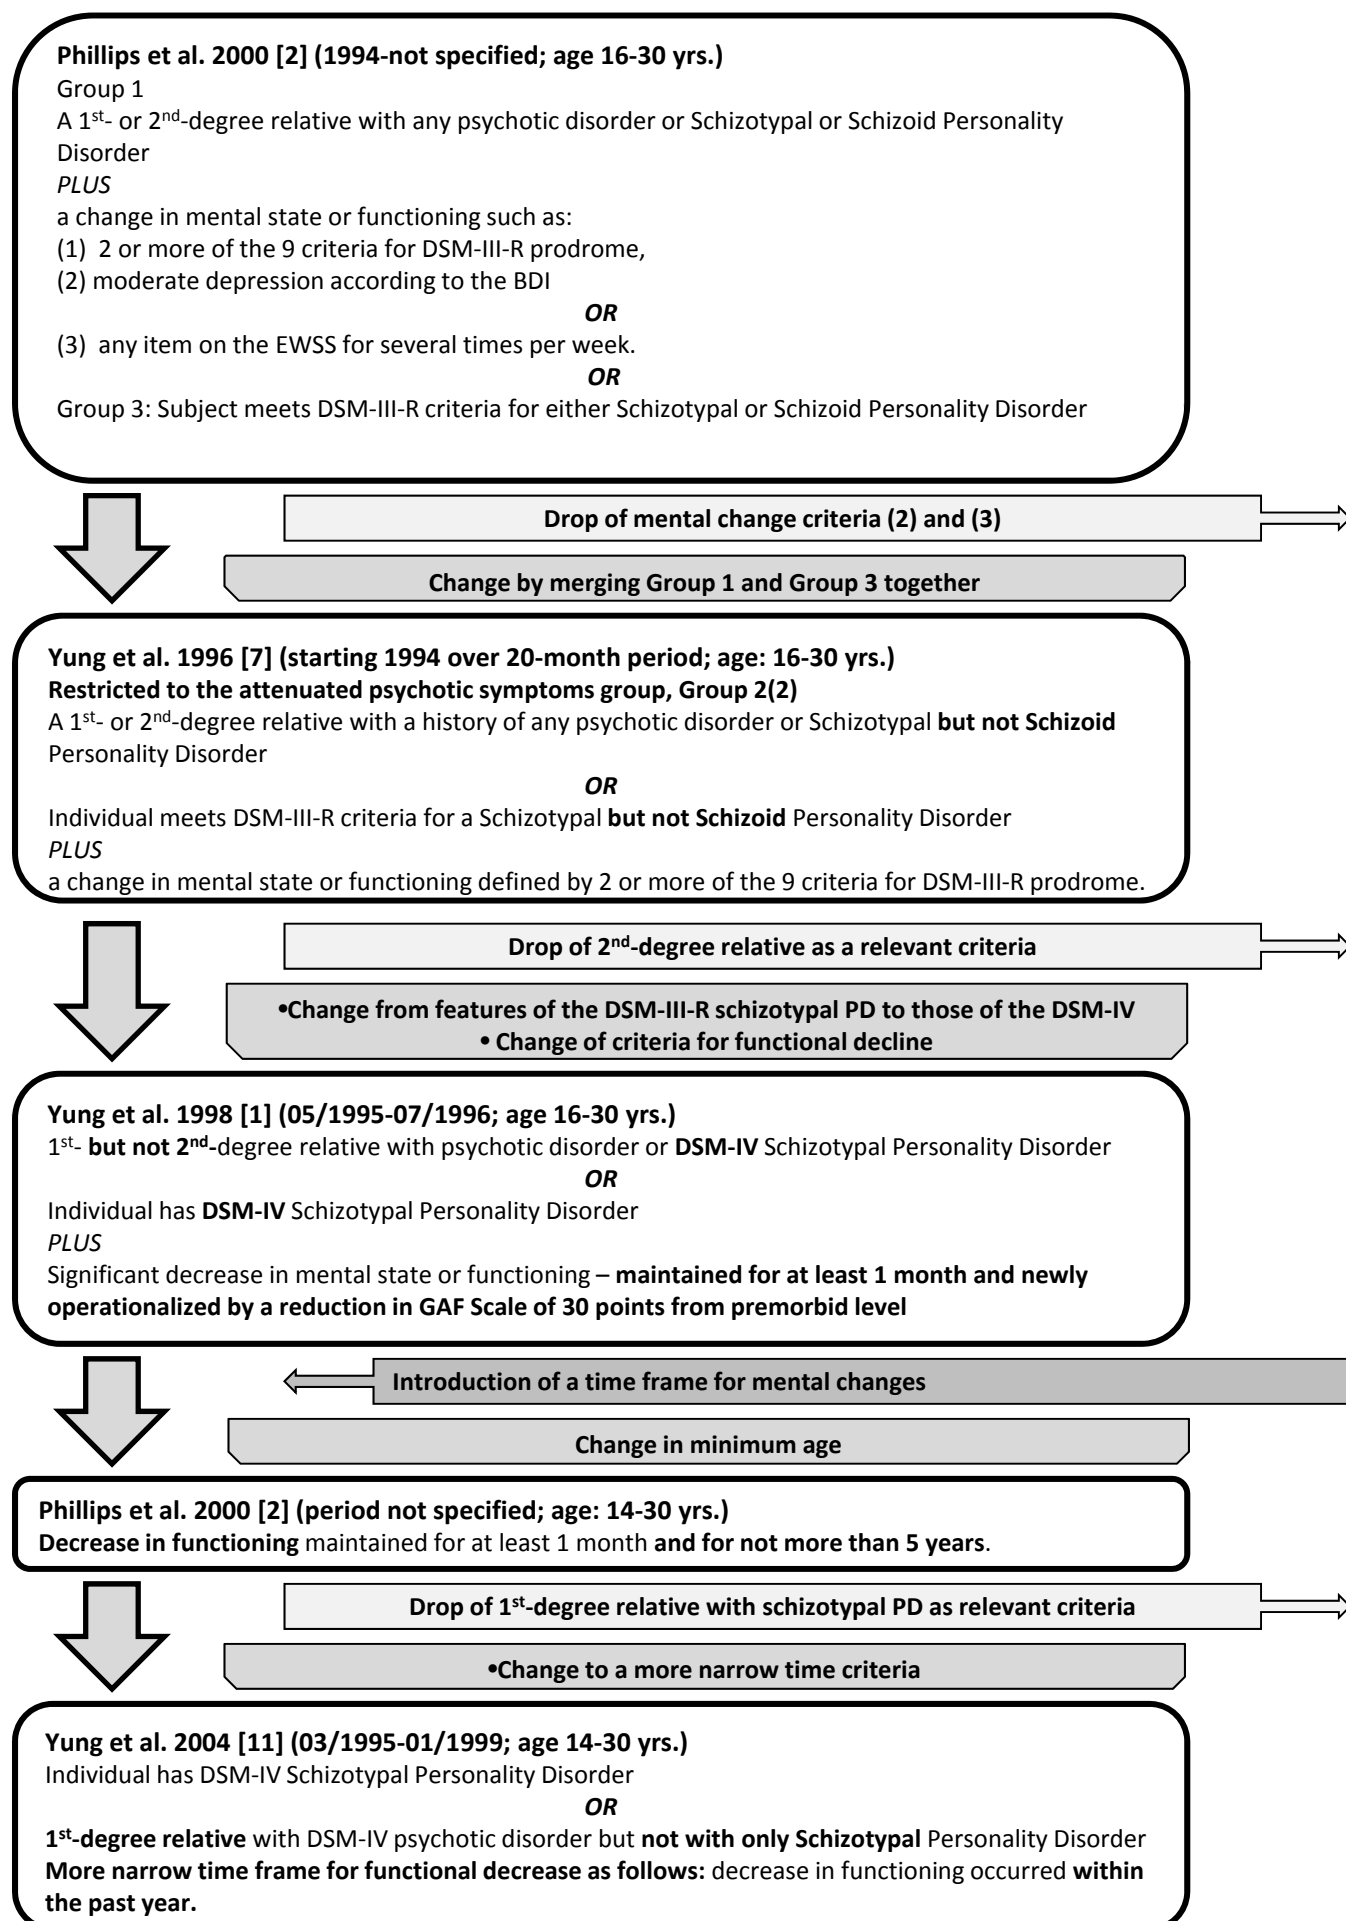

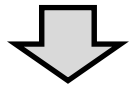

Change in functional decrease definition

**Yung et al. 2004 [12] CAARMS, version 01/2002 (assessment period and age range not specified)**  
**30% drop in GAF score** instead of 30 points on GAF score **from premorbid level.**

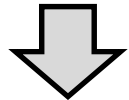

- Change definition of functional decline from GAF to SOFAS
- Change in restriction of maximum and minimum age

**Yung et al., CAARMS, version 12/2006 [13] (restriction in age range since 2005: age 15-25 yrs.)**

Family history of psychosis in 1<sup>st</sup>-degree relative OR Schizotypal Personality Disorder in identified patient

*PLUS*

**30% drop in SOFAS score** from premorbid level, sustained for 1 month, occurred within past 12 months

**OR**

**SOFAS score of 50 or less for past 12 months or longer**

BDI: Beck Depression Inventory (Beck AT, Ward CH, Mendelson M, Mock J, Erbaugh J: An inventory for measuring depression. Arch Gen Psychiatry 1961;4:561-571.)

EWSS: Early Warning Signs Survey (Birchwood M, Smith J, Macmillan F, Hogg B, Prasad R, Harvey C, Bering S: Predicting relapse in schizophrenia: the development and implementation of an early signs monitoring system using patients and families as observers, a preliminary investigation. Psychol Med 1989;19(3):649-56.)
