# Supplementary material
Source: publisher figshare collection journal article supplement (https://karger.figshare.com/articles/dataset/_/5123629)
Supplement: Supplementary file 1 [file 1 › 000339208_sm_Tables.pdf]

Supplementary Table 1: Attenuated Psychosis Syndrome (B 06), proposal by the Psychotic Disorders Work Group, updated August-03-2010 [5]

The work group is recommending that this be included in DSM-5 but is still examining the evidence as to whether inclusion is merited in the main manual or in an Appendix for Further Research.

All six of the following:

- A) Characteristic symptoms: at least one of the following in attenuated form with intact reality testing, but of sufficient severity and/or frequency that it is not discounted or ignored;
  - (i) delusions
  - (ii) hallucinations
  - (iii) disorganized speech
- B) Frequency/Currency: symptoms meeting criterion A must be present in the past month and occur at an average frequency of at least once per week in past month
- C) Progression: symptoms meeting criterion A must have begun in or significantly worsened in the past year
- D) Distress/Disability/Treatment Seeking: symptoms meeting criterion A are sufficiently distressing and disabling to the patient and/or parent/guardian to lead them to seek help
- E) Symptoms meeting criterion A are not better explained by any DSM-5 diagnosis, including substance-related disorder
- F) Clinical criteria for any DSM-5 psychotic disorder have never been met

Supplementary Table 2: Transition rates to psychosis in at-risk samples from the Personal Assessment and Crisis Evaluation (PACE) clinic

| Study<br>(recruitment period);<br>follow-up period                                                                                      | At-risk criteria;<br>sample size;<br>distribution of criteria in sample                                                                                                                               | Sample and treatment description                                                                                                                                             | Transition rate<br>(number of considered completers, if different<br>from sample size in column 2)                                                                                                                                               |
|-----------------------------------------------------------------------------------------------------------------------------------------|-------------------------------------------------------------------------------------------------------------------------------------------------------------------------------------------------------|------------------------------------------------------------------------------------------------------------------------------------------------------------------------------|--------------------------------------------------------------------------------------------------------------------------------------------------------------------------------------------------------------------------------------------------|
| <b>Studies conducted at the Personal Assessment and Crisis Evaluation (PACE) clinic</b>                                                 |                                                                                                                                                                                                       |                                                                                                                                                                              |                                                                                                                                                                                                                                                  |
| Yung et al. 1996 [6]<br>(1994, over 20-mth.<br>period)<br><b>≤20 mth.</b>                                                               | UHR acc. to DSM-III-R<br><b>N=33</b><br>suspiciousness/magical ideation=21<br>perceptual abnormalities=17<br>digressive/vague speech=3<br>markedly peculiar behaviour=4                               | age: 15-26;<br>74% male;<br>no specific antipsychotic treatment                                                                                                              | 21.2% within a maximum of 20 mth.                                                                                                                                                                                                                |
| Phillips et al. 2000 [2]<br><i>Pilot Study</i><br>(1994-not specified) <b>24<br/>mth.</b>                                               | UHR acc. to DSM-III-R<br><b>N=21</b><br>distribution of criteria not specified<br><br><u>note</u> : includes participants of [6]                                                                      | age: 16-30;<br>gender not specified;<br>treatment options not specified                                                                                                      | 33% within 24 mth.                                                                                                                                                                                                                               |
| Yung et al. 1998 [1]<br>(05/1995-07/1996)<br><b>≥6 mth.</b>                                                                             | UHR acc. to BPRS/CASH<br><b>N=20</b><br>distribution of criteria not specified                                                                                                                        | age: 16-30;<br>gender not specified;<br>no specific antipsychotic treatment                                                                                                  | 25% within 1 mth.<br>40% within 6 mth.                                                                                                                                                                                                           |
| Yung et al., 2003 <sup>A</sup> ;<br>Phillips et al. 2000 [2]<br><i>Prediction study</i><br>(03/1995-10/1996)<br><b>≤12 mth.</b>         | UHR acc. to BPRS/CASH<br><b>N1=49</b><br>APS, no BLIPS=29<br>BLIPS=12<br>only 'trait-state'=8                                                                                                         | age: 15-29;<br>51.0% male;<br>no antipsychotic treatment                                                                                                                     | 28.6% within 4.5 mth.<br>40.8% within 12 mth.<br>n=2 after 12 mth. (not entire sample)                                                                                                                                                           |
| McGorry et al. 2002 [40];<br>Phillips et al. 2007 <sup>B</sup><br>(10/1996-01/1999)<br><b>N1: 3-4 yrs</b><br><b>N2: ~ 6 and 12 mth.</b> | UHR acc. to BPRS/CASH<br><b>N1=59</b> (included in treatment study)<br>distribution of criteria not specified<br><br><b>N2=33</b> (refused treatment study)<br>distribution of criteria not specified | age: 14-28;<br>N1: 58% male;<br>N2: 42% male;<br>needs-based intervention only (NBI;<br>N1a=28 and N2) or<br>1-2mg/d Risperidone for 6 mth.<br>followed by NBI (RIS; N1b=31) | N1a (NBI): 36% within 6 and 12 mth. (28)<br>41.2% within 3-4 yrs. (17/28)<br><br>N1B (RIS): 10% within 6 mth. (31)<br>19% within 12 mth. (31)<br>45.8% within 3-4 yrs. (24/31)<br><br>N2 (refusers): 12.1% within 6 mth.<br>18.2% within 12 mth. |

| Study<br>(recruitment period);<br>follow-up period                                 | At-risk criteria;<br>sample size;<br>distribution of criteria in sample                                                                                                                                                                                                    | Sample and treatment description                                                                                                                                                                                                                                                 | Transition rate<br>(number of considered completers, if different<br>from sample size in column 2)   |
|------------------------------------------------------------------------------------|----------------------------------------------------------------------------------------------------------------------------------------------------------------------------------------------------------------------------------------------------------------------------|----------------------------------------------------------------------------------------------------------------------------------------------------------------------------------------------------------------------------------------------------------------------------------|------------------------------------------------------------------------------------------------------|
| Yung et al. 2004 [11]<br>(03/1995-01/1999)<br><b>≥6 mth.</b>                       | UHR acc. to BPRS/CASH<br><b>N=104</b><br>APS, no BLIPS=55<br>BLIPS=29<br>only 'trait-state'=20<br><br><u>note:</u> sample is a combination of <sup>A</sup> and<br>refuser / NBI samples of [40]                                                                            | age: 14-28;<br>gender not specified;<br>diverse; incl. antipsychotic treatment<br>(49% received no antipsychotic<br>treatment)                                                                                                                                                   | 27.9% within 6 mth.<br>36.7% within 12 mth. (98/104)<br><br>n=5 after 12 mth. (not entire sample)    |
| Yung et al. 2005 [14]<br>(not specified for N2, N3)<br><b>6 mth.</b>               | UHR acc. to CAARMS<br><b>N1=43</b><br>distribution of criteria not specified<br><br>no-UHR acc. to CAARMS<br><b>N2=107</b><br><br>UHR acc. to BPRS/CASH<br><b>N3=49</b><br><u>note:</u> same participants as in [2] and <sup>A</sup> ;<br>not reported again in this table | age of N1: 15-24;<br>age of N2 not specified;<br>gender of N1 and N2 not specified;<br>treatment options for N1 and N2 not<br>specified                                                                                                                                          | N1: 11.6% within 6 mth.<br><br>N2: 0.9% within 6 mth.                                                |
| Yung et al. 2007 <sup>C</sup><br>(04/1995-08/2000)<br><b>5 yrs.</b>                | UHR acc. to CAARMS<br><b>N=142</b><br>distribution of criteria not specified<br><br><u>note:</u> only participants of 3 previous<br>studies with UHR rated acc. to<br>BPRS/CASH                                                                                            | age and gender not specified;<br>treatment options not specified<br><br><u>note:</u> no re-scoring strategy from initial<br>BPRS/CASH to CAARMS<br>operationalizations reported;<br>CAARMS UHR criteria met by about<br>10% less patients than BPRS UHR<br>criteria <sup>8</sup> | 35.9% within 5 yrs.                                                                                  |
| Yung et al. 2006 [43],<br>2008 <sup>D</sup><br>(04/2003-10/2003)<br><b>24 mth.</b> | UHR acc. to CAARMS<br><b>N1=119</b><br>distribution of criteria not specified<br><br>no-UHR acc. to CAARMS<br><b>N2=173</b>                                                                                                                                                | age: 15-24;<br>49% male;<br>treatment options not specified                                                                                                                                                                                                                      | N1: 10.1% within 6 mth.<br>16.0% within 24 mth.<br><br>N2: 0.6% within 6 mth.<br>1.2% within 24 mth. |

| <b>Study</b><br>(recruitment period);<br><b>follow-up period</b>                                 | <b>At-risk criteria;</b><br>sample size;<br>distribution of criteria in sample                                                                                                                                           | <b>Sample and treatment description</b>                                                                                                                                                                                                                                | <b>Transition rate</b><br>(number of considered completers, if different<br>from sample size in column 2)                                                                                     |
|--------------------------------------------------------------------------------------------------|--------------------------------------------------------------------------------------------------------------------------------------------------------------------------------------------------------------------------|------------------------------------------------------------------------------------------------------------------------------------------------------------------------------------------------------------------------------------------------------------------------|-----------------------------------------------------------------------------------------------------------------------------------------------------------------------------------------------|
| Nelson et al. 2010 <sup>E</sup><br>(1994-2006)<br>(full publication pending)<br><b>5-15 yrs.</b> | UHR acc. to different operationalizations<br>(► suppl. table 1)<br><b>N=411</b><br>distribution of criteria not specified<br><br><u>note:</u> participants of previous studies                                           | age and gender not specified;<br>treatment options not specified                                                                                                                                                                                                       | 17.1% within 12 mth.<br>20.9% within 2 yrs.<br>25.0% within 3 yrs.<br>29.3% within ≥5 yrs. (not entire sample)<br><br><u>note:</u> follow-up period of 2005 and 2006<br>samples not specified |
| Yung et al. 2010 [39]<br>(1994-2006)<br>(full publication pending)<br><b>≤15 yrs.</b>            | UHR acc. to different operationalizations<br>(► suppl. table 1)<br><b>N=311</b><br>distribution of criteria not specified<br><br><u>note:</u> part of 416 participants of previous<br>PACE research studies <sup>E</sup> | age and gender not specified;<br>treatment options not specified                                                                                                                                                                                                       | 16.6% within 12 mth.<br>20.6% within 2 yrs.<br>24.7% within 3 yrs.<br>30.0% within 5 yrs.<br>34.8% within 10 yrs.                                                                             |
| Yung et al. 2011 [41]<br>(08/2000-05/2006 or<br>05/2007)<br><b>6 mth.</b>                        | UHR acc. to CAARMS<br><b>N1=115</b> (included in treatment study)<br>distribution of criteria not specified<br><br><b>N2=78</b> (refused treatment study)<br>distribution of criteria not specified                      | age of N1: 14-30;<br>age of N2 not specified;<br>gender of N1 and N2 not specified;<br>cognitive therapy and Risperidone<br>(CT-RIS; N1a=43) or CT and placebo<br>(CT-P; N1b=44) or supportive therapy<br>and placebo (ST-P; N1c=28);<br>treatment of N2 not specified | CT-RIS (N1a): 5.6% within 6 mth. (36/43)<br>CT-P (N1b): 11.2% within 6 mth. (35/44)<br>ST-P (N1c): 9.1% within 6 mth. (22/28)<br><br>refusers (N2): 10.8% within 6 mth. (37/78)               |
| Nelson & Yung 2010 [26]<br>(08/2000-02/2007)<br><b>12 mth.</b>                                   | UHR acc. to CAARMS<br><b>N=168</b><br>distribution of criteria not specified                                                                                                                                             | age: 14-26;<br>39.3% male;<br>active treatment incl. antipsychotic<br>treatment                                                                                                                                                                                        | 8.9% within 12 mth.                                                                                                                                                                           |

<sup>A</sup> Yung AR, Phillips LJ, Yuen HP, Francey SM, McFarlane CA, Hallgren M, McGorry PD: Psychosis prediction: 12-month follow up of a high-risk ("prodromal") group. Schizophr Res 2003;60(1):21-32.

<sup>B</sup> Phillips LJ, McGorry PD, Yuen HP, Ward J, Donovan K, Kelly D, Francey SM, Yung AR: Medium term follow-up of a randomized controlled trial of interventions for young people at ultra high risk of psychosis. Schizophr Res 2007;96(1-3):25-33.

<sup>C</sup> Yung AR, Yuen HP, Berger G, Francey S, Hung TC, Nelson B, Phillips L, McGorry P: Declining transition rate in ultra high risk (prodromal) services: dilution or reduction of risk? Schizophr Bull 2007;33(3):673-81.

<sup>D</sup> Yung AR, Nelson B, Stanford C, Simmons MB, Cosgrave EM, Killackey E, Phillips LJ, Bechdolf A, Buckby J, McGorry PD: Validation of "prodromal" criteria to detect individuals at ultra high risk of psychosis: 2 year follow-up. Schizophr Res 2008;105(1-3):10-7.

<sup>E</sup> Nelson B, Yung AR, Yuen HP, Spiliotacopoulos D, Lin A, Bruxner AL, Broussard CM, Simmons MB, McGorry PD: Long term follow up of an ultra high risk ("prodromal") group. Schizophr Res 2010;117(2-3):179.

Supplementary Table 3: Transition rates to psychosis in at-risk samples outside PACE defined by CAARMS/PACE UHR criteria

| Study<br>(recruitment period);<br>follow-up period                                        | At-risk criteria;<br>sample size;<br>distribution of criteria in sample                                                                              | Sample and treatment description                                                                                                              | Transition rate<br>(number of considered completers, if different<br>from sample size in column 2)                                                         |
|-------------------------------------------------------------------------------------------|------------------------------------------------------------------------------------------------------------------------------------------------------|-----------------------------------------------------------------------------------------------------------------------------------------------|------------------------------------------------------------------------------------------------------------------------------------------------------------|
| <b>Studies using CAARMS/PACE UHR criteria</b>                                             |                                                                                                                                                      |                                                                                                                                               |                                                                                                                                                            |
| Carr et al. 2000 <sup>F</sup><br>(1997-not specified)<br><b>4-34 mth.</b>                 | UHR acc. to BPRS/CASH<br><b>N=23</b><br>distribution of criteria not specified                                                                       | mean age: 17.6;<br>61.7% male;<br>no antipsychotic treatment                                                                                  | 9% within 4-34 mth. (mean 14.6 mth.)                                                                                                                       |
| Mason et al. 2004 [25]<br>(1997-2002)<br><b>≥12 mth.</b>                                  | UHR acc. to CAARMS<br><b>N=74</b><br>APS, no BLIPS=38<br>BLIPS=23<br>only 'trait-state'=13<br><br><i>note: includes participants of <sup>F</sup></i> | age: 13-28;<br>52.7% male;<br>no antipsychotic treatment                                                                                      | 50.0% within ≥12 mth. (mean: 26 mth.)<br><br>APS, no BLIPS: 55.3%<br>BLIPS: 60.9%<br>only 'trait-state': 15.4%                                             |
| Broome et al. 2005 [23]<br>(not specified; over 30<br>mth. period)<br><b>≥6 mth.</b>      | UHR acc. to CAARMS<br><b>N=58</b><br>APS, no BLIPS=45<br>BLIPS=12<br>only 'trait-state'=1                                                            | age: 14-35;<br>65.5% male;<br>diverse; incl. antipsychotic medication                                                                         | 11.3% within ≥6 mth. (53/58)                                                                                                                               |
| Kéri et al. 2006 <sup>G</sup><br>(not specified in English<br>abstract)<br><b>12 mth.</b> | UHR acc. to PACE<br><b>N=42</b><br>distribution of criteria not specified in<br>abstract<br><br><i>note: instrument not specified</i>                | age and gender not specified;<br>low-dose antipsychotic treatment plus<br>supportive therapy for 6 mth.<br>followed by 6-mth. monitoring only | 7.1% within 6 as well as 12 mth.                                                                                                                           |
| Lam, et al. 2006 [24]<br>(06/2002-04/2003)<br><b>6 mth.</b>                               | UHR acc. to CAARMS<br><b>N=62</b><br>APS, no BLIPS=46<br>BLIPS=12<br>only 'trait-state'=4                                                            | age: 9-25;<br>58.1% male;<br>needs-based intervention without<br>antipsychotic treatment                                                      | 25.8% within 3 mth.<br>29.0% within 6 mth.<br><br>APS, no BLIPS: 32.6% within 6 mth.<br>BLIPS: 25.0% within 6 mth.<br>only 'trait-state': 0% within 6 mth. |
| Miyakoshi et al. 2008<br>[42]<br>(not specified)<br><b>6 mth.</b>                         | UHR acc. to CAARMS<br><b>N=33</b><br>distribution of criteria not specified                                                                          | age: 14-35;<br>69.7% male;<br>diverse; incl. antipsychotic medication<br>(n=13)                                                               | 12.1% within 6 mth.<br><br>antipsychotic-naïve subsample (N=20): 15.0%<br>within 6 mth.                                                                    |

<sup>F</sup> Carr V, Halpin S, Lau N, O'Brien S, Beckmann J, Lewin T: A risk factor screening and assessment protocol for schizophrenia and related psychosis. Aust N Z J Psychiatry 2000;34(Suppl.):S170-S180.

<sup>G</sup> Keri S, Kelemen O, Janka Z: [Therapy of mental states at high risk for psychosis: preliminary results from Hungary]. Orv Hetil 2006;147(5):201-204.

Supplementary Table 4: Transition rates to psychosis in at-risk samples using SIPS UHR Criteria (COPS)

| Study<br>(recruitment period);<br>follow-up period                      | At-risk criteria;<br>sample size;<br>distribution of criteria in sample                                                                                                                                                                         | Sample and treatment description                                                                                                                                 | Transition rate<br>(number of considered completers, if different<br>from sample size in column 2)                                                                                                                                            |
|-------------------------------------------------------------------------|-------------------------------------------------------------------------------------------------------------------------------------------------------------------------------------------------------------------------------------------------|------------------------------------------------------------------------------------------------------------------------------------------------------------------|-----------------------------------------------------------------------------------------------------------------------------------------------------------------------------------------------------------------------------------------------|
| <b>Studies using SIPS UHR criteria (COPS)</b>                           |                                                                                                                                                                                                                                                 |                                                                                                                                                                  |                                                                                                                                                                                                                                               |
| *Miller et al. 2002 [21]<br>(01/1998-06/2000)<br><b>12 mth.</b>         | UHR acc. to SIPS (COPS)<br><b>N1=13</b><br>APS, no BLIPS=12<br>BLIPS=1<br><br>no-UHR acc. to SIPS (COPS)<br><b>N2=16</b>                                                                                                                        | mean age: 17.8;<br>66% male;<br>treatment options not specified                                                                                                  | N1: 46% within 6 mth.<br>54% within 12 mth.<br><br>N2: 0% within 12 mth.                                                                                                                                                                      |
| *McGlashan et al. 2006<br>[29]<br>(01/1998-07/2001)<br><b>24 mth.</b>   | UHR acc. to SIPS (COPS)<br><b>N=60</b><br>APS, no BLIPS=57<br>BLIPS=0<br>only 'trait-state'=3<br><br><u>note:</u> n=10 already reported for an<br>unspecified period in <sup>H</sup>                                                            | age: 12-36;<br>65% male;<br>5-15mg/d Olanzapine (OLA; N1=31)<br>or placebo (P; N2=29); each for 12<br>mth., followed by monitoring only for a<br>further 12 mth. | 26.7% within 12 mth.<br>29.4% within 13-24 mth. (17/60)<br><br>OLA (N1): 16.1% within 12 mth.<br>33.3% within 13-24 mth. (9/31)<br><br>P (N2): 37.9% within 12 mth.<br>25.0% within 13-24 mth. (8/29)                                         |
| Lemos et al. 2006 [45]<br>(not specified)<br><b>12 mth.</b>             | UHR acc. to SIPS (COPS)<br><b>N=30</b><br>distribution of criteria not specified                                                                                                                                                                | age: 15-31;<br>56.7% male;<br>cognitive- behavioural and<br>psychopharmacological therapy                                                                        | 26.7% within 12 mth. (22/30)                                                                                                                                                                                                                  |
| *Pinkham et al. 2007 [30]<br>(not specified)<br>follow-up not specified | UHR acc. to SIPS (COPS)<br><b>N=19</b><br>APS, no BLIPS=17<br>BLIPS=2<br>only 'trait-state'=0                                                                                                                                                   | mean age: 21.7;<br>32% male;<br>diverse; incl. antipsychotic treatment                                                                                           | 26% within 12 mth.                                                                                                                                                                                                                            |
| Cannon et al. 2008 [17]<br>(1998-2005)<br><b>6-30 mth.</b>              | UHR acc. to SIPS (COPS)<br><b>N=291</b><br>APS, no BLIPS=282<br>BLIPS=7<br>only 'trait-state'=2<br><br><u>note:</u> NAPLS consists pooled data from 8<br>independently conceived research<br>projects <sup>I</sup> , indicated by * in column 1 | mean age: 18.1;<br>58.4% male;<br>diverse; incl. antipsychotic medication                                                                                        | 12.7% within 6 mth.<br>21.7% within 12 mth.<br>26.8% within 18 mth.<br>32.6% within 24 mth.<br>35.3% within 30 mth.<br><br><u>note:</u> transitions rates are adjusted at follow-ups<br>beyond 6 <sup>th</sup> month for unreported drop-outs |

| <b>Study</b><br>(recruitment period);<br><b>follow-up period</b>                | <b>At-risk criteria;</b><br>sample size;<br>distribution of criteria in sample                                                                  | <b>Sample and treatment description</b>                                                                         | <b>Transition rate</b><br>(number of considered completers, if different<br>from sample size in column 2)                                    |
|---------------------------------------------------------------------------------|-------------------------------------------------------------------------------------------------------------------------------------------------|-----------------------------------------------------------------------------------------------------------------|----------------------------------------------------------------------------------------------------------------------------------------------|
| Lemos-Giráldez et al.<br>2009 [27]<br>(2002-not specified)<br><b>3 yrs.</b>     | UHR acc. to SIPS (COPS)<br><b>N=61</b><br>APS, no BLIPS=52<br>BLIPS=3<br>only 'trait-state'=6<br><br><u>note:</u> includes participants of [45] | age: 17-31;<br>65.6% male;<br>cognitive-behavioural and<br>psychopharmacological therapy                        | 18.0% within 12 mth. (45/61)<br>22.9% within 3 yrs. (27/61)                                                                                  |
| Simon & Umbricht 2010<br>[31]<br>(not specified)<br><b>12 mth.</b>              | UHR acc. to SIPS (COPS)<br><b>N=72</b><br>APS, no BLIPS=67<br>BLIPS=3<br>only 'trait-state'=2                                                   | age 14-40;<br>59.7% male;<br>diverse; incl. antipsychotic medication                                            | 14.3% within 12 mth. (49/69)<br><br>further:<br>59.2% remission from UHR status<br>26.5% maintenance of UHR status                           |
| Kwon et al. 2010 [28]<br>(11/2004-08/2009) <b>mean<br/>follow-up of 16 mth.</b> | UHR acc. to SIPS (COPS) and/or<br>CAARMS<br><b>N=69</b><br>APS, no BLIPS=61<br>BLIPS=1<br>only 'trait-state'=7                                  | age: 15-35;<br>60.9% male;<br>antipsychotic and/or antidepressive<br>pharmacological treatment                  | 24.1% within 16 mth. on average (54/69)                                                                                                      |
| Addington et al. 2011<br>[44]<br>(not specified)<br><b>18 mth.</b>              | UHR acc. to SIPS (COPS)<br><b>N=51</b><br>distribution of criteria not specified                                                                | age 14-30;<br>70.6% male;<br>cognitive-behavioural therapy (CBT;<br>N1=27) or supportive therapy (ST;<br>N2=24) | CBT (N1): 0% within 6, 12 as well as 18 mth.<br>(19, 16 and 15/27)<br><br>ST (N2): 16% within 6, 12 as well as 18 mth.<br>(19, 15 and 13/24) |

\* included in NAPLS [17,']

<sup>H</sup> Miller TJ, McGlashan TH, Woods SW, Stein K, Driesen N, Corcoran CM, Hoffman R, Davidson L: Symptom assessment in schizophrenic prodromal states. Psychiatr Q 1999;70(4):273-287.

<sup>I</sup> Addington J, Cadenhead KS, Cannon TD, Cornblatt B, McGlashan TH, Perkins DO, Seidman LJ, Tsuang M, Walker EF, Woods SW, Heinssen R: North American Prodrome Longitudinal Study: a collaborative multisite approach to prodromal schizophrenia research. Schizophr Bull 2007;33(3):665-672.

Supplementary Table 5: Transition rates to psychosis in at-risk samples operationalized by different UHR/UHR-like criteria

| <b>Studies using a different UHR/UHR-like operationalization</b>                           |                                                                                                                                                                                        |                                                                                                                                                                                          |                                                                                                                                                                                                                                                                                                               |
|--------------------------------------------------------------------------------------------|----------------------------------------------------------------------------------------------------------------------------------------------------------------------------------------|------------------------------------------------------------------------------------------------------------------------------------------------------------------------------------------|---------------------------------------------------------------------------------------------------------------------------------------------------------------------------------------------------------------------------------------------------------------------------------------------------------------|
| <i>Positive And Negative Syndrome Scales (PANSS)</i>                                       |                                                                                                                                                                                        |                                                                                                                                                                                          |                                                                                                                                                                                                                                                                                                               |
| Morrison et al. 2004 [32], 2007 <sup>J</sup><br>(2000-not specified) <b>12 and 36 mth.</b> | UHR acc. to PANSS<br><b>N=58</b><br>APS, no BLIPS=48<br>BLIPS=6<br>only 'trait-state'=4<br><br><u>note</u> : transition rates at ≥6 mth. are already reported for n=23 in <sup>K</sup> | age: 16-36;<br>70% male;<br>cognitive therapy (CT; N1=35) or treatment as usual (TAU; N2=23) for 6 mth., followed by 6-mth. monitoring; antipsychotic medication possible after baseline | 12.0% within 6 mth. (50/58)<br>25.0% within 12 mth. (32/58)<br>52% within 3 yrs. (27/58)<br><br>CT (N1): 6.5% within 6 mth. (31/35)<br>7.7% within 12 mth. (26/35)<br>41.0% within 3 yrs. (17/35)<br><br>TAU (N2): 21.1% within 6 mth. (19/23)<br>37.5% within 12 mth. (16/23)<br>70.0% within 3 yrs. (10/23) |
| Amminger et al. 2010 [33]<br>(04/2004-05/2006) <b>12 mth.</b>                              | UHR acc. to PANSS<br><b>N=81</b><br>APS, no BLIPS=44<br>BLIPS=35<br>only 'trait-state'=2                                                                                               | age: 13-25;<br>33.3% male;<br>1.2 g/d ω-3 PUFA (PUFA; N1=41) or placebo for 12 weeks (P; N2=40) followed by 40 weeks monitoring only                                                     | 17.1% within 12 mth. n=76<br><br>PUFA (N1): 5.3% within 12 mth. (38/421)<br>P (N2): 28.9% within 12 mth. (38/40)                                                                                                                                                                                              |
| <i>Clinical High Risk (CHR) criteria</i>                                                   |                                                                                                                                                                                        |                                                                                                                                                                                          |                                                                                                                                                                                                                                                                                                               |
| *Cornblatt et al. 2003 <sup>L</sup><br>(1998-2001)<br>follow-up not specified              | CHR acc. to SIPS<br><b>N=62</b><br>only attenuated negative Sx=20<br>APS=42                                                                                                            | age: 18-22;<br>71% male;<br>diverse; incl. antipsychotic medication                                                                                                                      | 18.8% within 12 mth. on average<br>0% with attenuated negative symptoms<br>26.5% with APS                                                                                                                                                                                                                     |
| *Lencz et al. 2006 <sup>M</sup><br>(01/1998-07/2001) <b>6-68 mth.</b>                      | CHR acc. to SIPS<br><b>N=38</b><br>only APS                                                                                                                                            | mean age: 16.5;<br>58% male;<br>diverse; incl. antipsychotic medication                                                                                                                  | 36.4% within 22 mth. on average (33/38)                                                                                                                                                                                                                                                                       |
| *Cornblatt et al. 2007 [46]<br>(01/1998-06/2005) <b>2-88 mth.</b>                          | CHR acc. to SIPS<br><b>N=48</b><br>only APS<br><br><u>note</u> : includes participants of <sup>L</sup> and <sup>M</sup>                                                                | 12-18;<br>60.4% male;<br>antipsychotic and/or antidepressive medication                                                                                                                  | 25.9% within 30.5 mth. on average<br><br>n=1 within 6 mth.<br>n=2 within 7-12 mth.<br>n=6 within 13-24 mth.<br>n=2 within ≥25 mth.                                                                                                                                                                            |
| Olvet et al. 2010 <sup>N</sup><br>(not specified)<br>follow-up not specified               | CHR acc. to SIPS<br><b>N=147</b><br>distribution of criteria not specified                                                                                                             | mean age: 16;<br>68.7% male;<br>diverse; incl. antipsychotic medication                                                                                                                  | 23.1% with an unspecified period                                                                                                                                                                                                                                                                              |

| <i>CARE extension of UHR criteria</i>                                                |                                                                                                                                                                |                                                                      |                                                                                                                                          |
|--------------------------------------------------------------------------------------|----------------------------------------------------------------------------------------------------------------------------------------------------------------|----------------------------------------------------------------------|------------------------------------------------------------------------------------------------------------------------------------------|
| * Kristensen & Cadenhead, 2007 [47]<br>(2000-2005)<br><b>12 mth.</b>                 | CARE extension acc. to SIPS<br><b>N=48</b><br>distribution of criteria not specified<br><br>note: n=40 already reported in <sup>o</sup>                        | age 12-30;<br>54.2% male;<br>diverse; incl. antipsychotic medication | 12.5% within 12 mth.                                                                                                                     |
| <i>EPOS extension of UHR criteria</i>                                                |                                                                                                                                                                |                                                                      |                                                                                                                                          |
| Ruhrmann et al. 2010 [18]<br>(08/2002-08/2006)<br><b>18 mth.</b>                     | EPOS extension acc. to SIPS & COGDIS<br><b>N=245</b><br>UHR and COGDIS=146<br>only UHR=74<br>only COGDIS=25                                                    | age 16-35;<br>55.9% male;<br>diverse; incl. antipsychotic medication | 20.2% within 18 mth. (183/245)                                                                                                           |
| Ziermans et al. 2011 [48]<br>(not specified)<br><b>24 mth.</b>                       | EPOS extension acc. to SIPS & COGDIS<br><b>N=72</b><br>distribution of criteria irrespective of overlap:<br>APS =65<br>BLIPS=4<br>'trait-state'=3<br>COGDIS=39 | age 12-18;<br>61.1% male;<br>diverse; incl. antipsychotic medication | 11.2% within 12 mth. (62/72)<br>15.5% within 24 mth. (58/72)                                                                             |
| <i>FEPSY criteria</i>                                                                |                                                                                                                                                                |                                                                      |                                                                                                                                          |
| Riecher-Rössler et al., 2007 [35], 2008 [36]<br>(03/2000-02/2003)<br><b>2-5 yrs.</b> | FEPSY criteria<br><b>N=58</b><br>distribution of criteria not specified                                                                                        | age: ≥18;<br>58.6% male;<br>no antipsychotic treatment               | 14.0% within 6 mth. (50/58)<br>24.0% within 12 mth. (50/58)<br>26.0% within 2 yrs. (50/58)<br>32.0% within >2 yrs. (≤50/58; Mdn=39 mth.) |

\* included in NAPLS [17]

- <sup>J</sup> Morrison AP, French P, Parker S, Roberts M, Stevens H, Bentall RP, Lewis SW: Three-year follow-up of a randomized controlled trial of cognitive therapy for the prevention of psychosis in people at ultrahigh risk. Schizophr Bull 2007;33(3):682-687.
- <sup>K</sup> Morrison AP, Bentall RP, French P, Walford L, Kilcommons A, Knight A, Kreutz M, Lewis SW: Randomised controlled trial of early detection and cognitive therapy for preventing transition to psychosis in high-risk individuals. Study design and interim analysis of transition rate and psychological risk factors. Br J Psychiatry 2002;43 (Suppl.):s78-s84.
- <sup>L</sup> Cornblatt BA, Lencz T, Smith CW, Correll CU, Auther AM, Nakayama E: The schizophrenia prodrome revisited: a neurodevelopmental perspective. Schizophr Bull 2003;29(4):633-651.
- <sup>M</sup> Lencz T, Smith CW, McLaughlin D, Auther A, Nakayama E, Hovey L, Cornblatt BA: Generalized and specific neurocognitive deficits in prodromal schizophrenia. Biol Psychiatry 2006;59(9):863-871.
- <sup>N</sup> Olvet DM, Stearns WH, McLaughlin D, Auther AM, Correll CU, Cornblatt BA: Comparing clinical and neurocognitive features of the schizophrenia prodrome to the bipolar prodrome. Schizophr Res 2010;123(1):59-63.
- <sup>O</sup> Haroun N, Dunn L, Haroun A, Cadenhead KS: Risk and protection in prodromal schizophrenia: ethical implications for clinical practice and future research. Schizophr Bull 2006;32(1):166-178.
